# Supplementary material for: Selective inclusion of PO43− within persistent dimeric capsules of a tris(thiourea) receptor and evidence of cation/solvent sealed unimolecular capsules
Source: Royal Society of Chemistry journal article supplement (doi:10.1039/c2dt30687e), 2012-01-01
Supplement: c2dt30687e.pdf [file c2dt30687e.pdf]

## **Electronic Supporting Information**

### **Selective inclusion of $\text{PO}_4^{3-}$ within persistent dimeric capsules of a tris(thiourea) receptor and evidence of cation/solvent sealed unimolecular capsules**

*Sandeep Kumar Dey and Gopal Das\**

*Department of Chemistry, Indian Institute of Technology Guwahati, Assam, 781039, India.*

*Fax: +91-361-258-2349; Tel: +91-361-258-2313*

*E-mail: [gdas@iitg.ernet.in](mailto:gdas@iitg.ernet.in)*

## Characterization of receptor L:

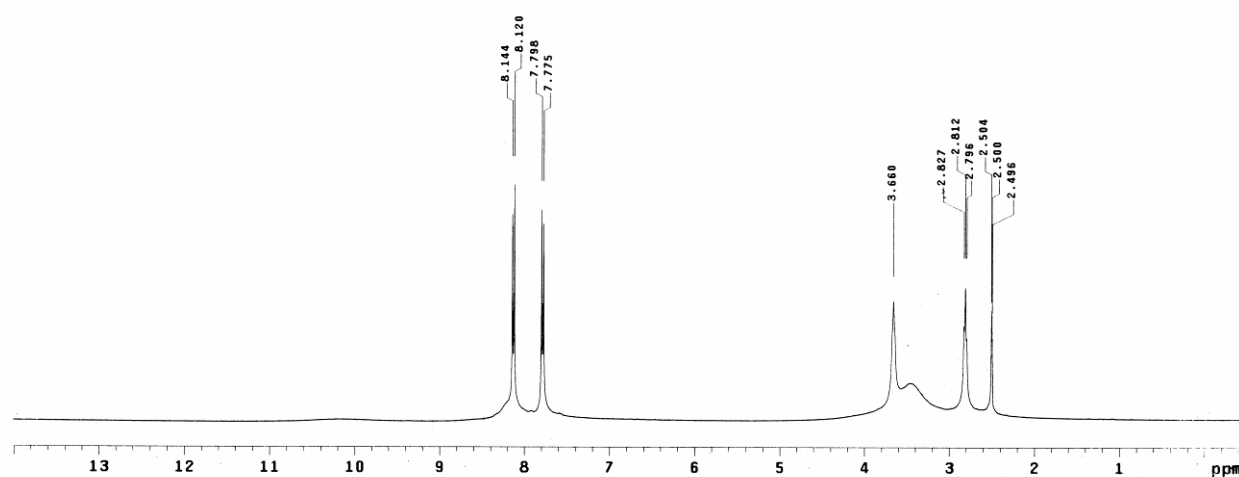

**Figure S1.** <sup>1</sup>H NMR spectrum of L in DMSO-*d*<sub>6</sub> at 298 K.

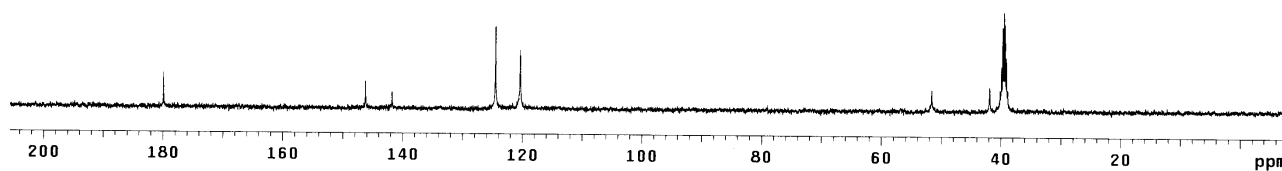

**Figure S2.** <sup>13</sup>C NMR spectrum of L in DMSO-*d*<sub>6</sub> at 298 K.

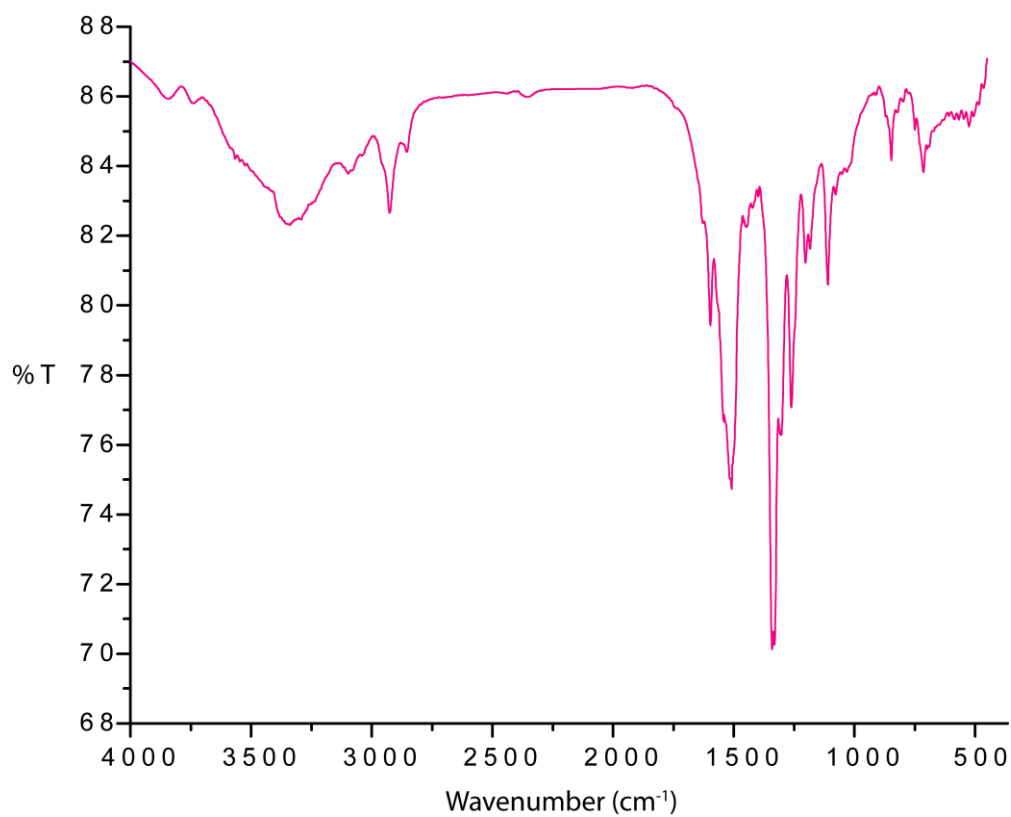

**Figure S3.** FT-IR spectrum of receptor L recorded in KBr pellet.

Characterization of  $\text{HPO}_4^{2-}$ -complex,  $[\text{2}(\text{HL})^+ \cdot \text{HPO}_4^{2-}] \cdot 3\text{H}_2\text{O}$  (**1a**):

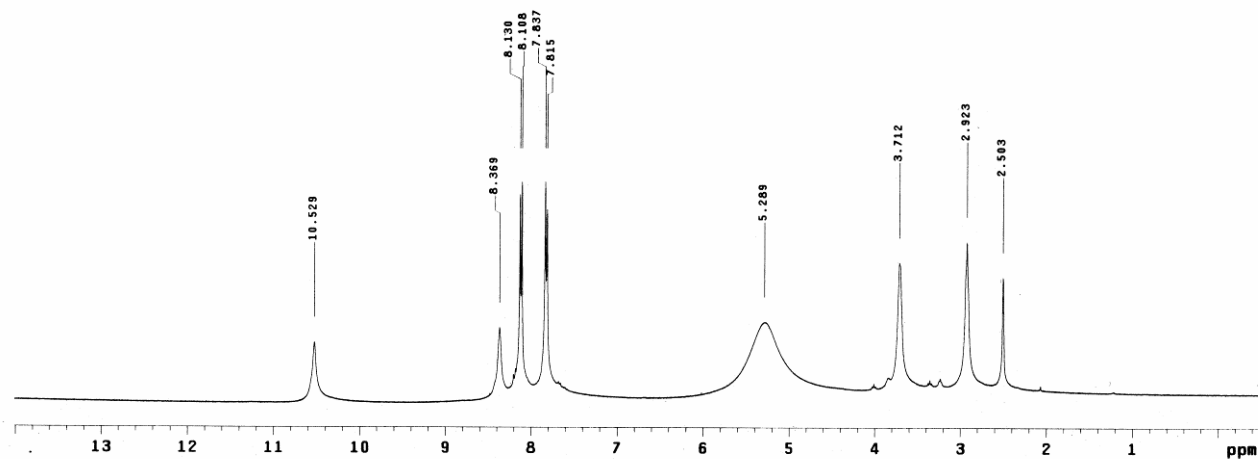

Figure S4.  $^1\text{H}$  NMR spectrum of complex **1a** in  $\text{DMSO-}d_6$  at 298 K.

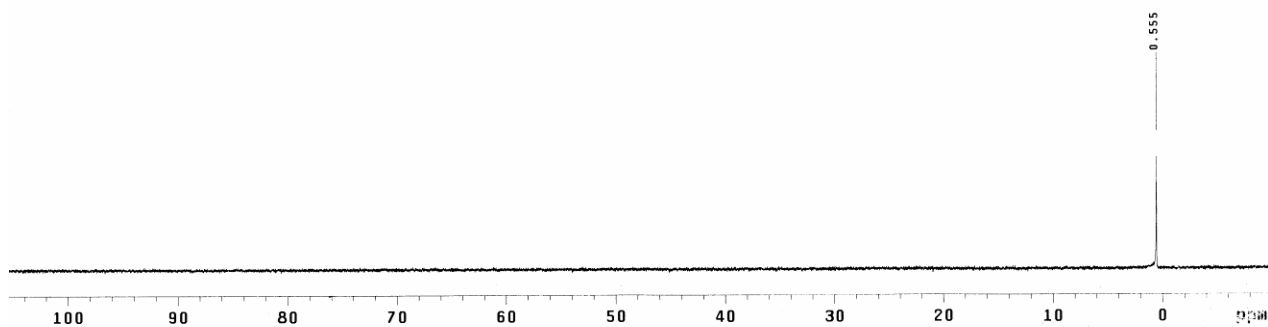

Figure S5.  $^{31}\text{P}$  NMR spectrum of complex **1a** in  $\text{DMSO-}d_6$  at 298 K.

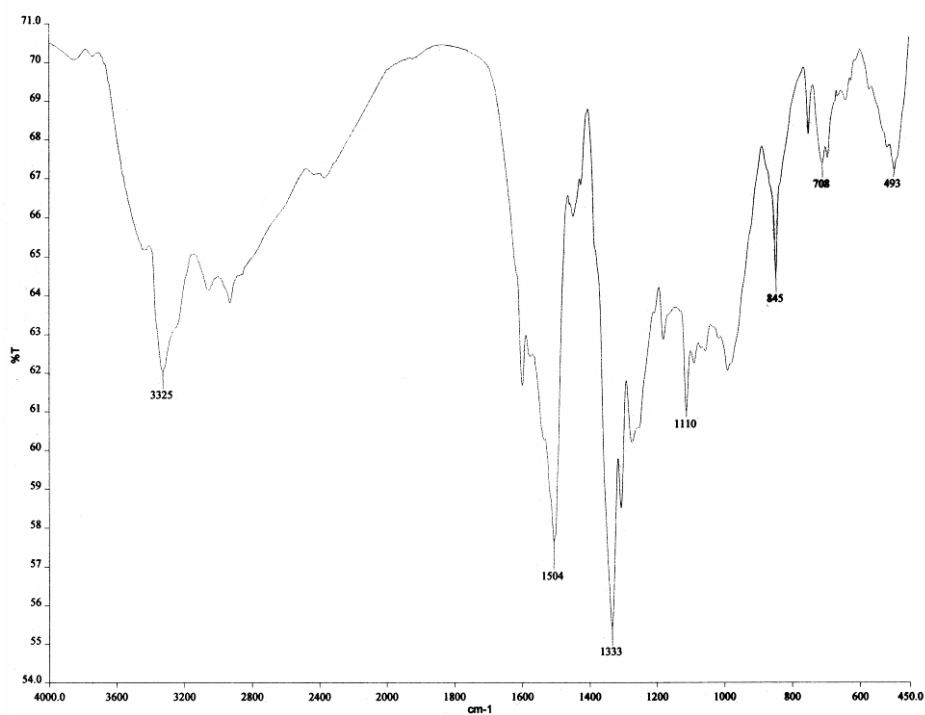

Figure S6. FT-IR spectrum of complex **1a** recorded in KBr pellet.

Characterization of  $\text{PO}_4^{3-}$ -encapsulated complex,  $3\text{TBA}^+[\text{2L}(\text{PO}_4^{3-})]_2\text{MeCN}$  (**1**):

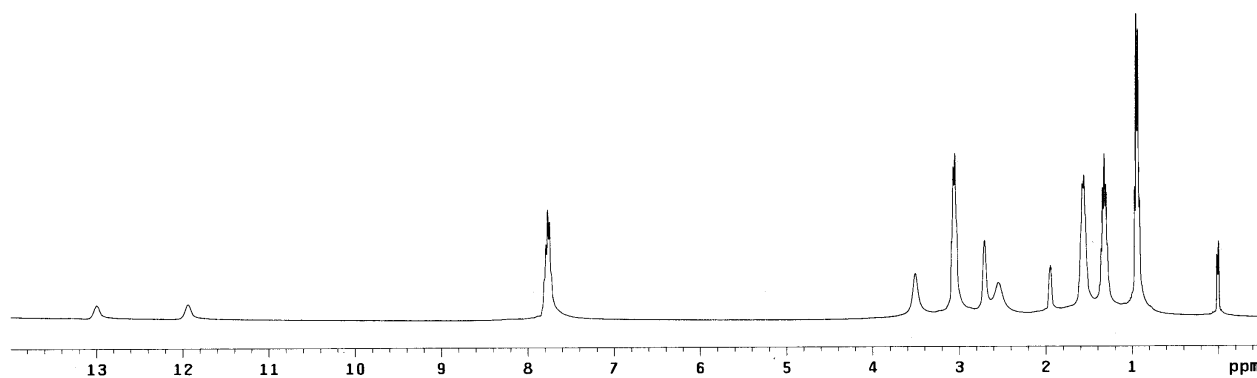

Figure S7.  $^1\text{H}$  NMR spectrum of complex **1** in  $\text{DMSO-}d_6$  at 298 K.

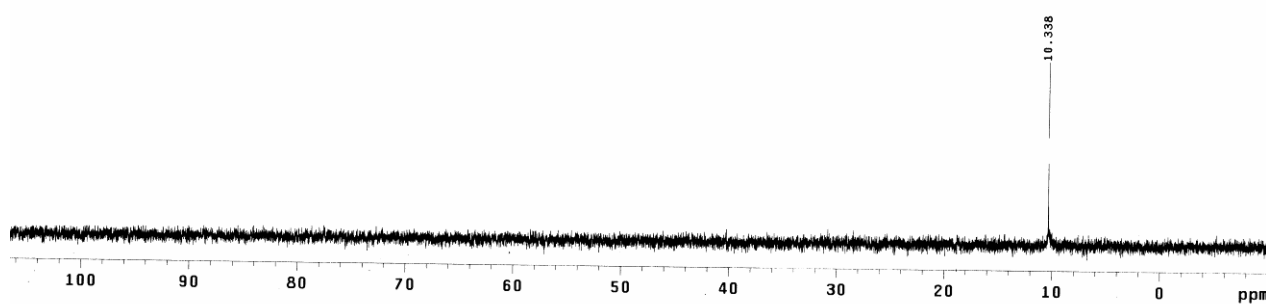

Figure S8.  $^{31}\text{P}$  NMR spectrum of complex **1** in  $\text{DMSO-}d_6$  at 298 K.

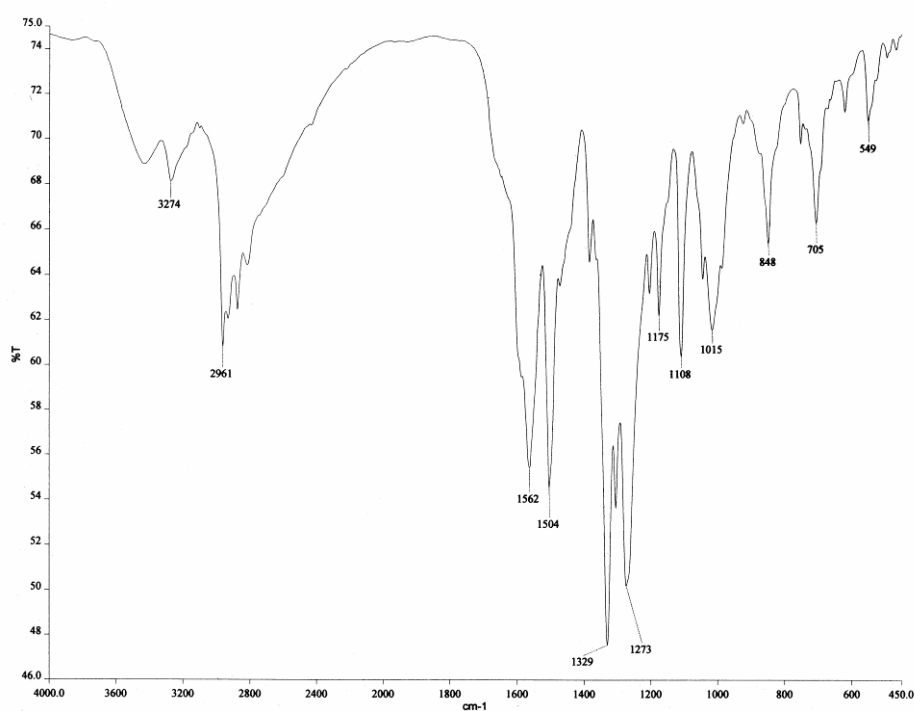

Figure S9. FT-IR spectrum of complex **1** recorded in KBr pellet.

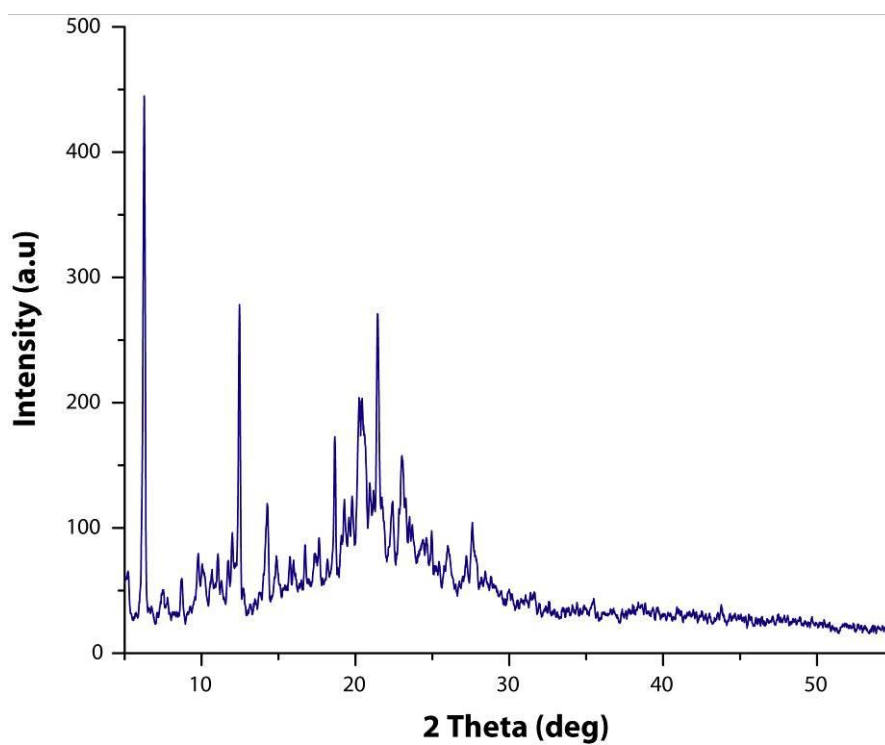

**Figure S10.** Powder XRD patterns of complex **1** recorded with dried crystalline powders.

**Characterization of  $\text{PO}_4^{3-}$ -encapsulated complex,  $3\text{TEA}^+[\text{2L}(\text{PO}_4^{3-})]$  (**1b**):**

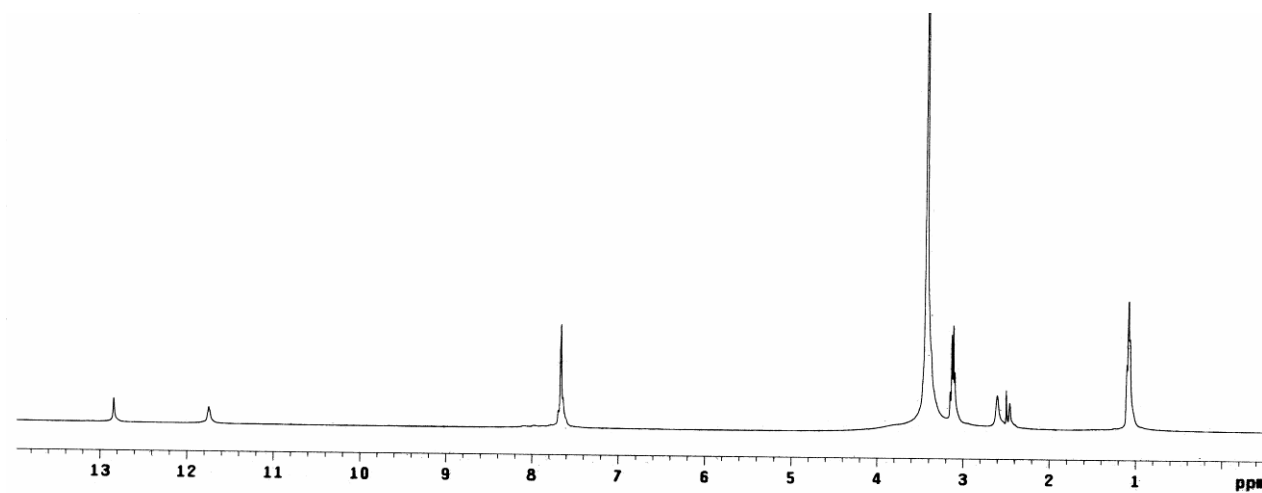

**Figure S11.** <sup>1</sup>H NMR spectrum of complex **1b** in DMSO-*d*<sub>6</sub> at 298 K.

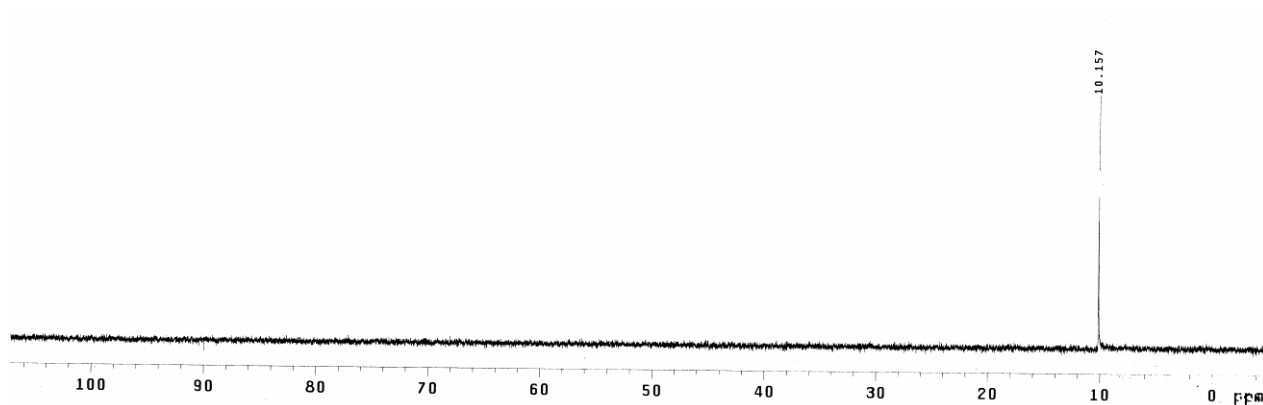

**Figure S12.**  $^{31}\text{P}$  NMR spectrum of complex **1b** in  $\text{DMSO-}d_6$  at 298 K.

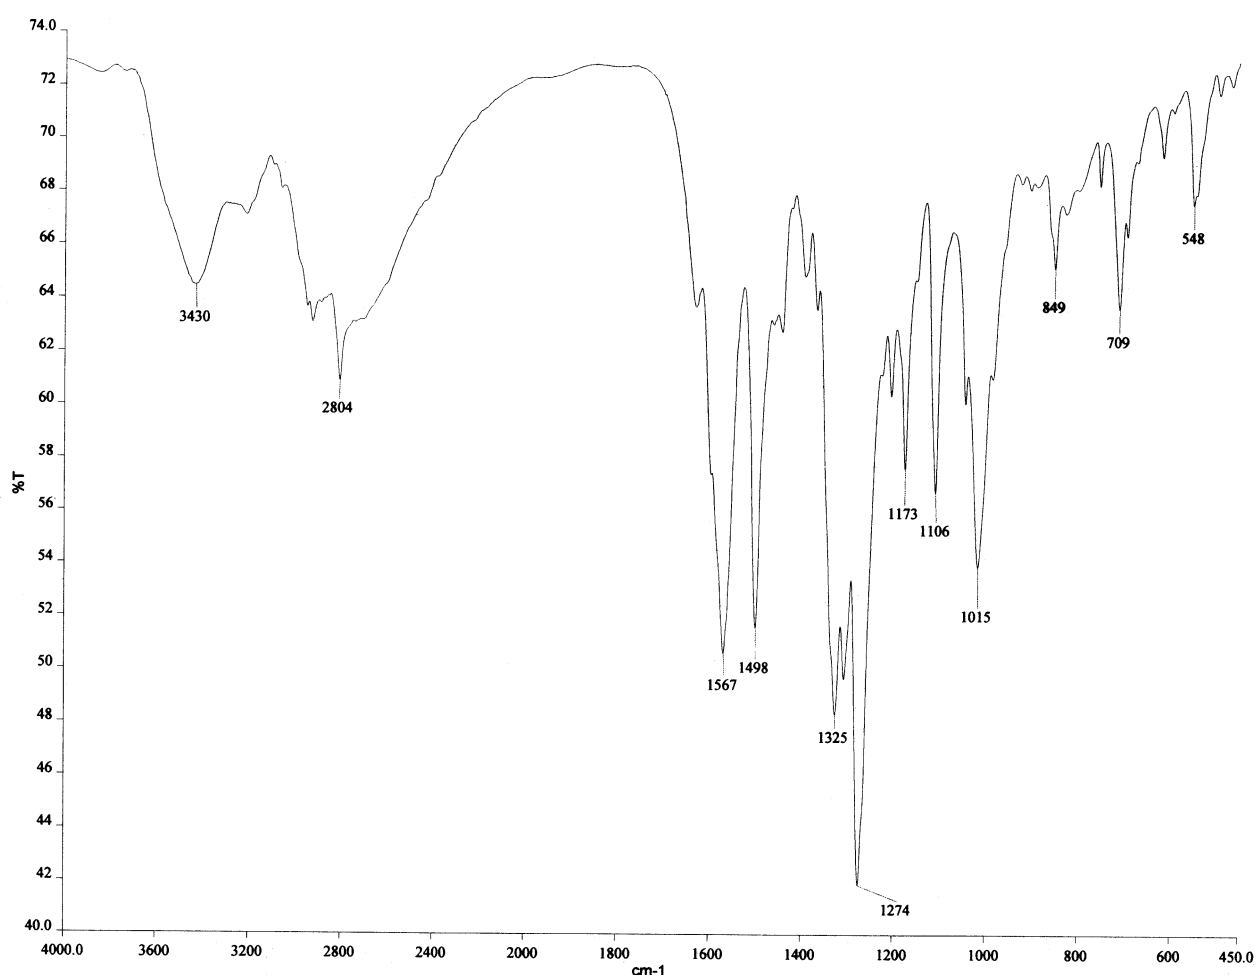

**Figure S13.** FT-IR spectrum of complex **1b** recorded in KBr pellet.

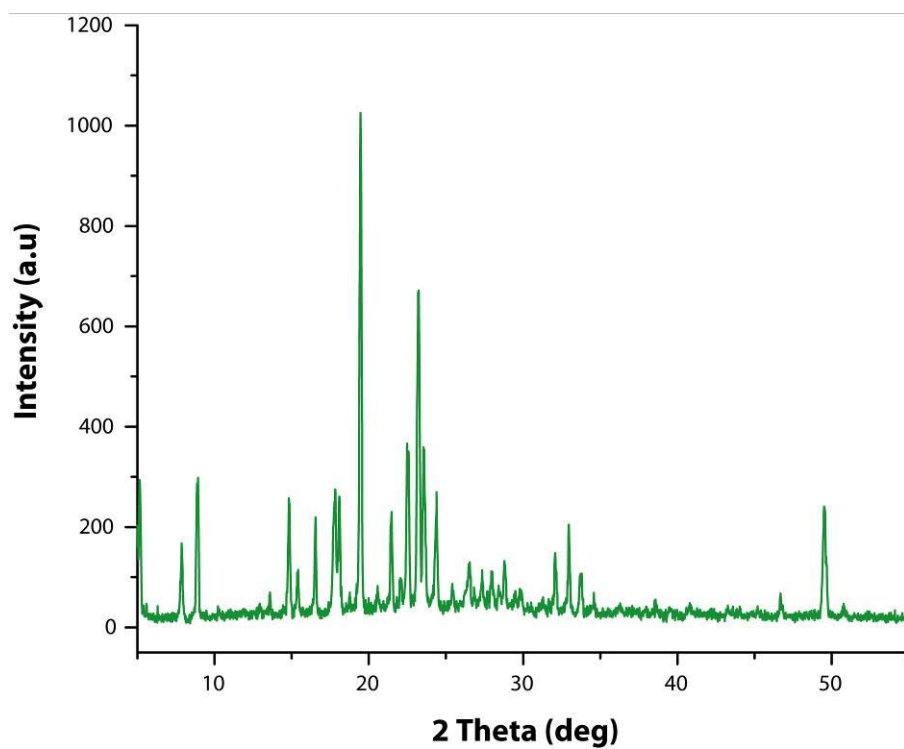

**Figure S14.** Powder XRD patterns of complex **1b** recorded with dried crystalline powders.

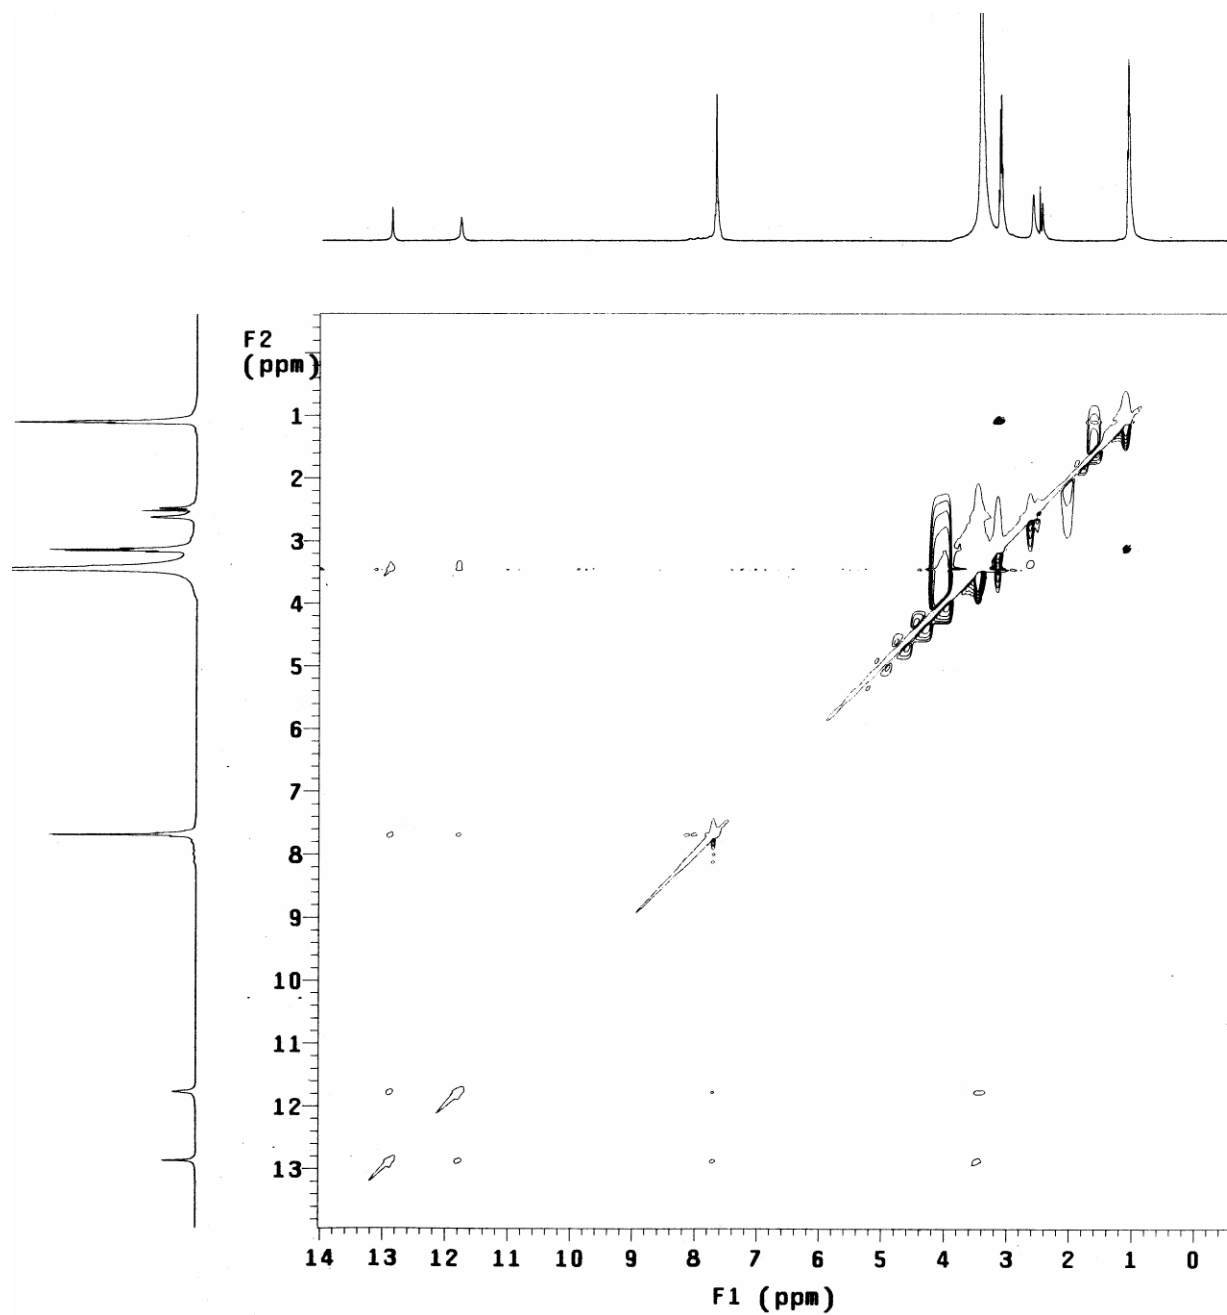

**Figure S15.** 2D-NOESY NMR spectrum of complex **1b** in DMSO-*d*<sub>6</sub> at 298 K.



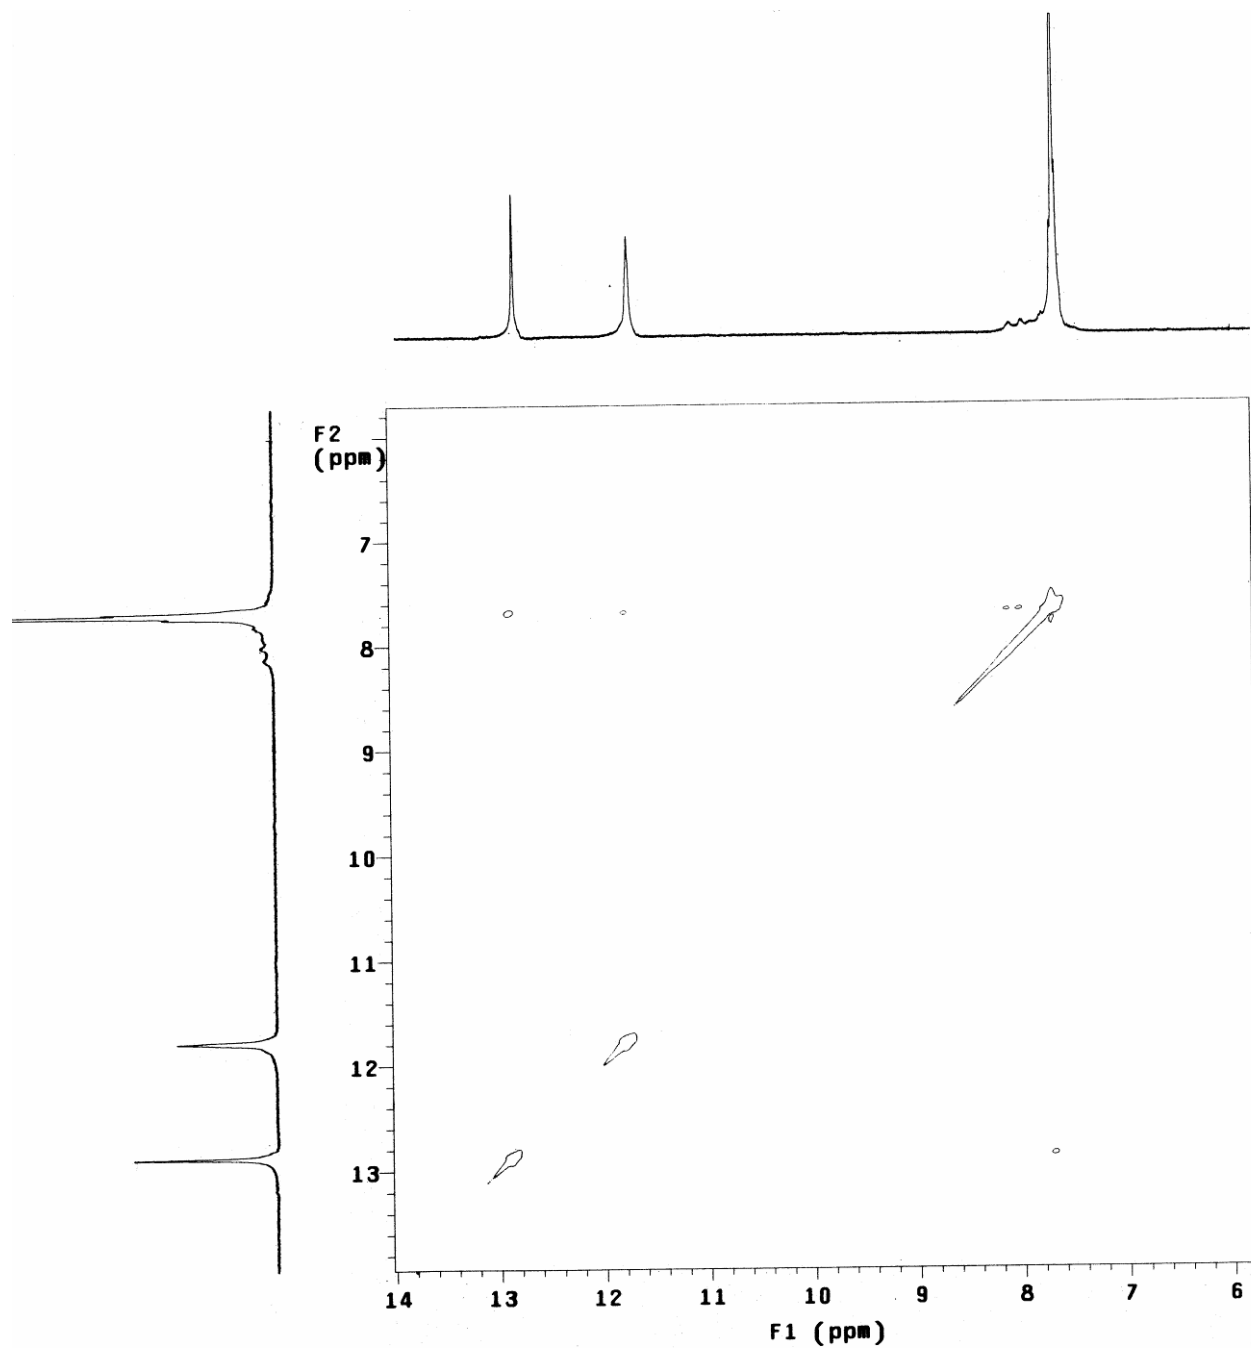

**Figure S16.** Partial (aromatic region) 2D-NOESY NMR spectrum of complex **1b** in DMSO- $d_6$  at 298 K, in presence of 0.5 equivalent 2:1 mixture of TBA(OH) and TBA(H<sub>2</sub>PO<sub>4</sub>).

**Characterization of F<sup>-</sup>-encapsulated complex, TBA<sup>+</sup>[L(F)]•2DMSO (2a):**

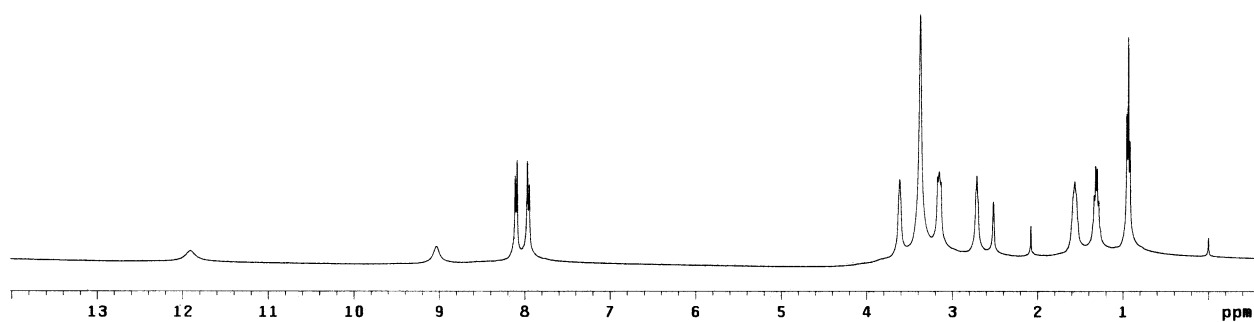

**Figure S17.** <sup>1</sup>H NMR spectrum of complex **2a** in DMSO-*d*<sub>6</sub> at 298 K.

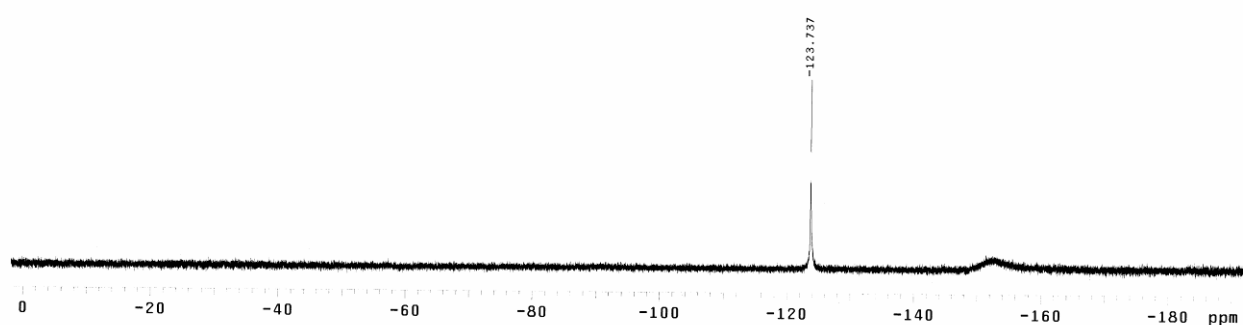

**Figure S18.** <sup>19</sup>F NMR spectrum of complex **2a** in DMSO-*d*<sub>6</sub> at 298 K.

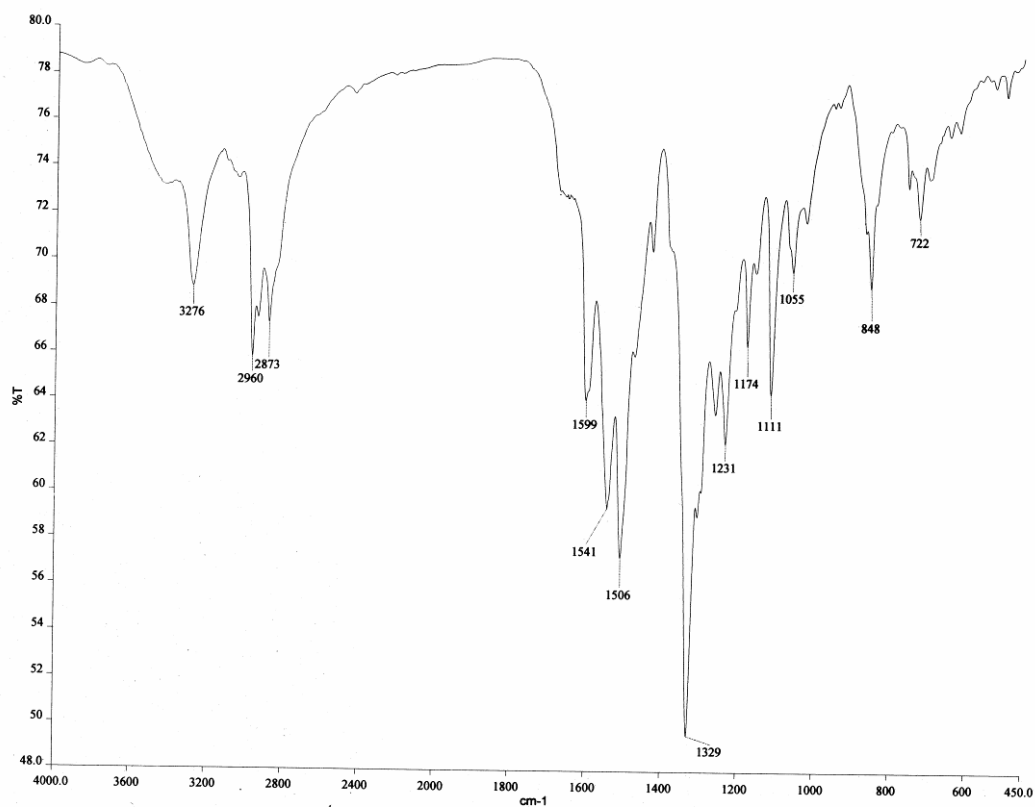

**Figure S19.** FT-IR spectrum of complex **2a** recorded in KBr pellet.

Characterization of  $\text{CO}_3^{2-}$ -encapsulated complex,  $2\text{TEA}^+[\text{2L}(\text{CO}_3^{2-})]$  (**3**):

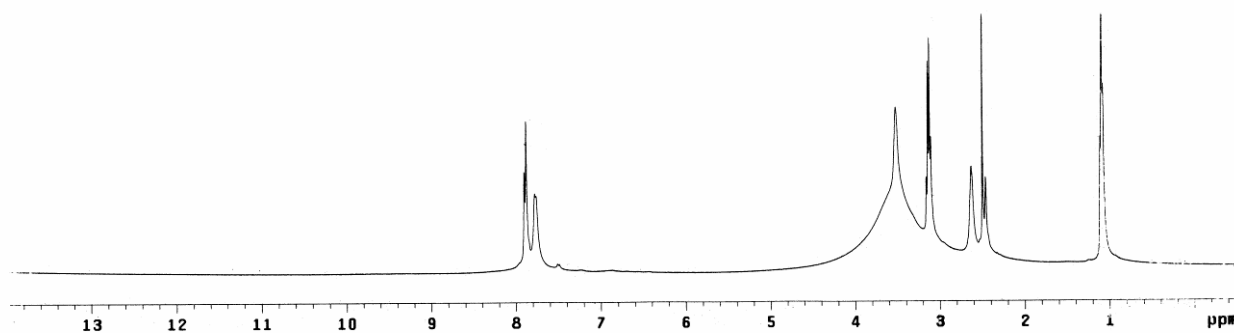

Figure S20.  $^1\text{H}$  NMR spectrum of complex **3** in  $\text{DMSO-}d_6$  at 298 K.

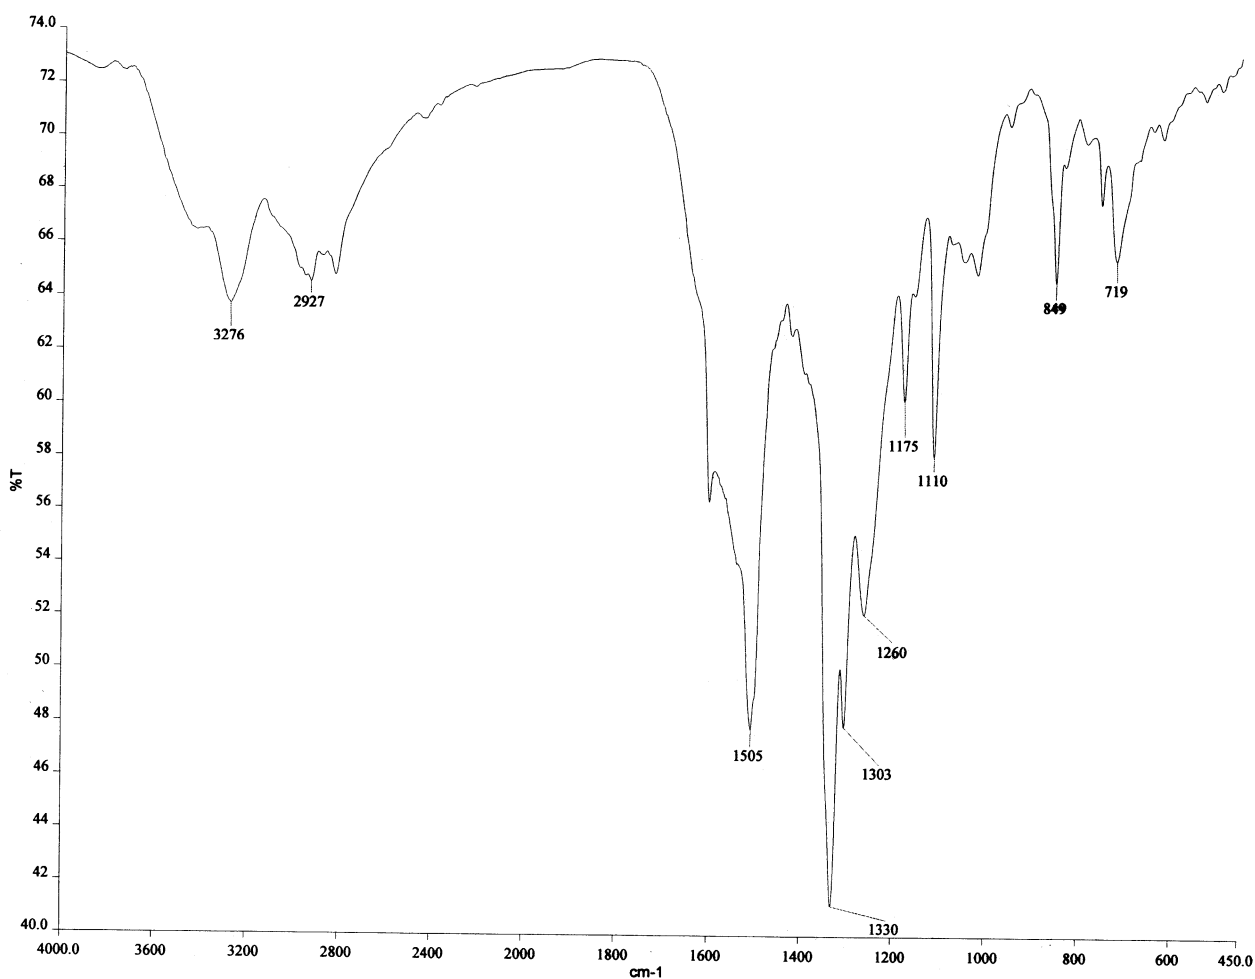

Figure S21. FT-IR spectrum of complex **3** recorded in KBr pellet.

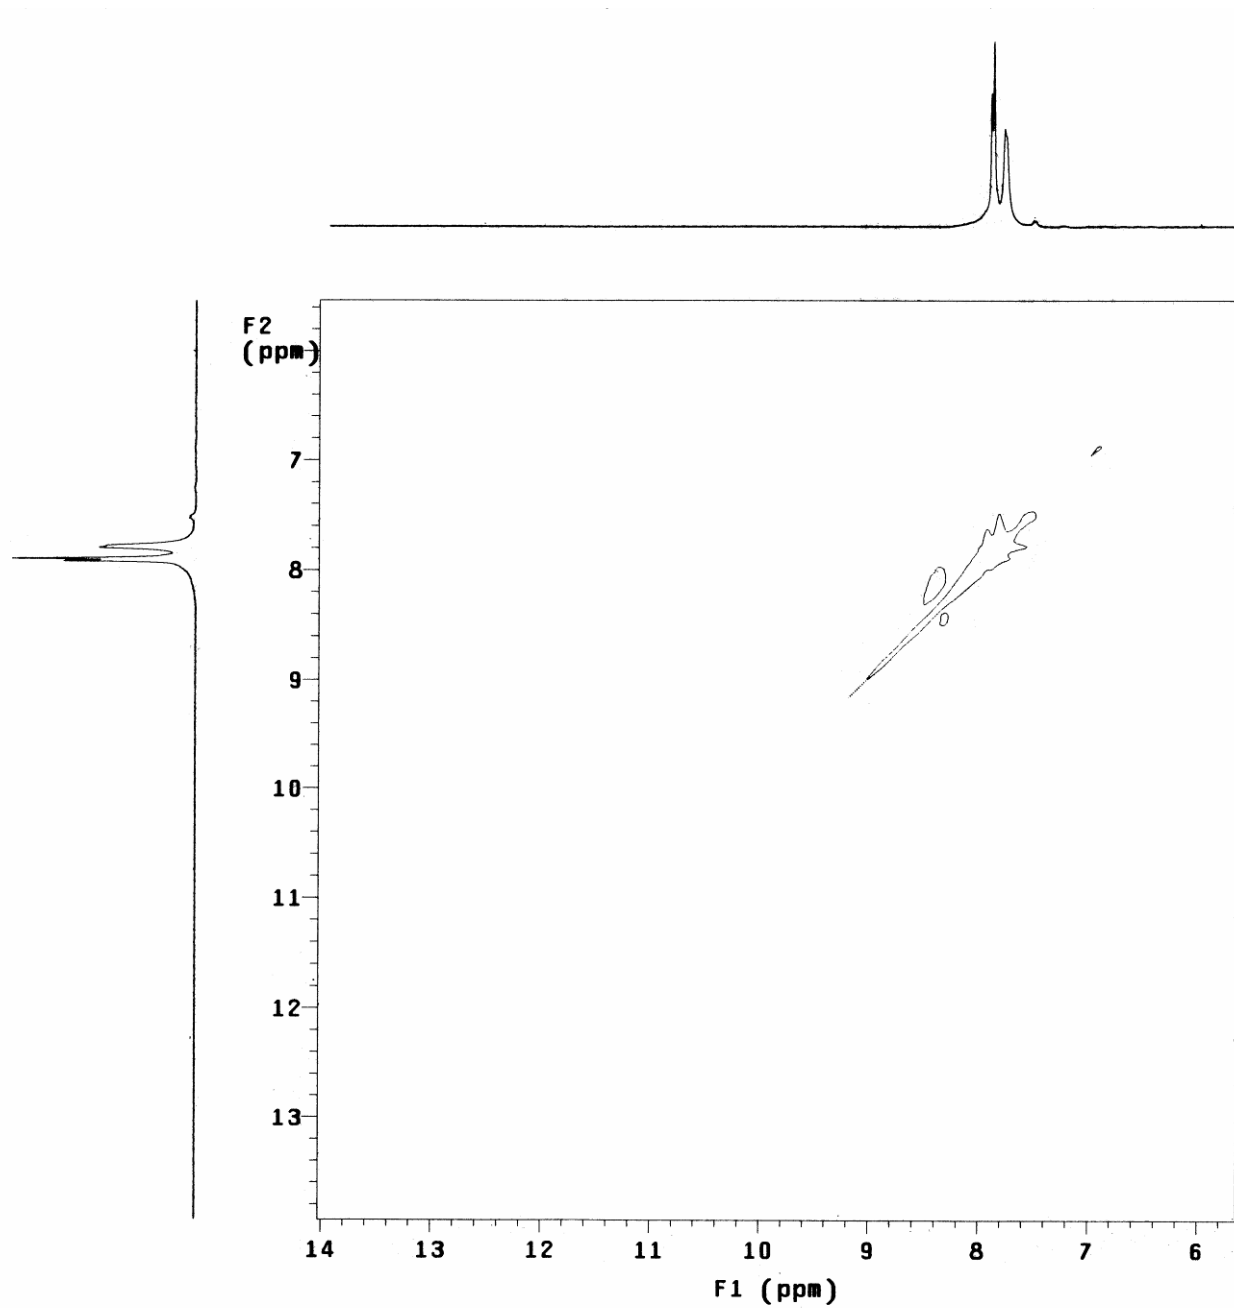

**Figure S22.** Partial (aromatic region) 2D-NOESY NMR spectrum of complex **3** in DMSO-*d*<sub>6</sub> at 298 K.

### Characterization of $\text{SO}_4^{2-}$ -encapsulated complex, $2\text{TBA}^+[\text{L}(\text{SO}_4^{2-})]$ (**4**):

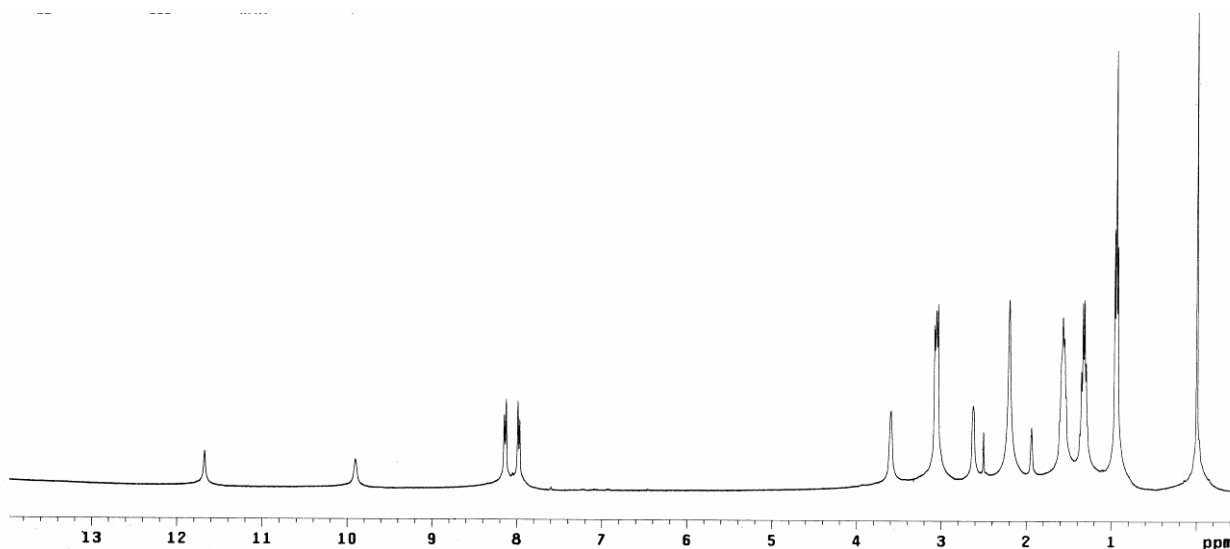

Figure S23.  $^1\text{H}$  NMR spectrum of complex **4** in  $\text{DMSO}-d_6$  at 298 K.

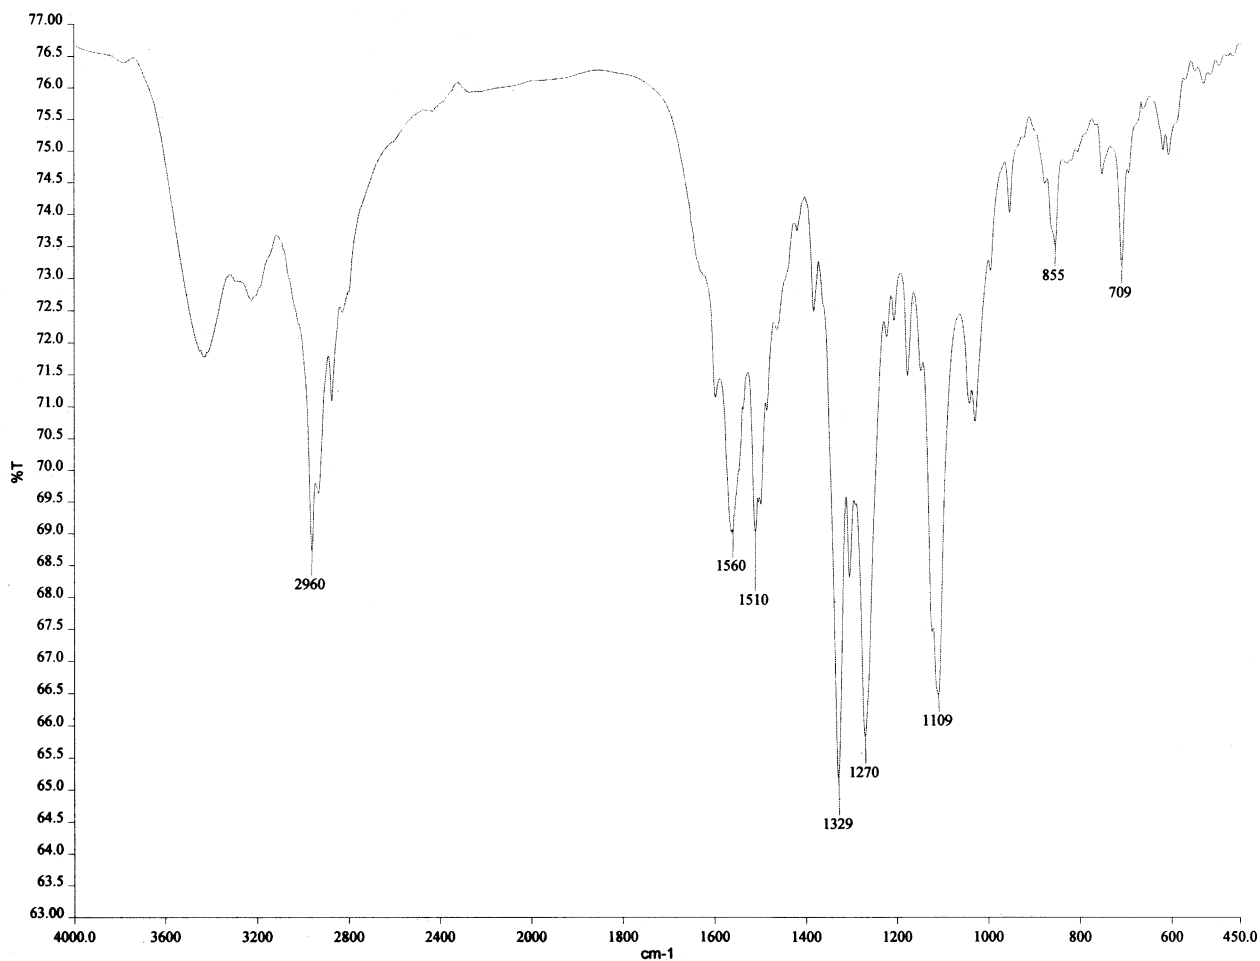

Figure S24. FT-IR spectrum of complex **4** recorded in KBr pellet.

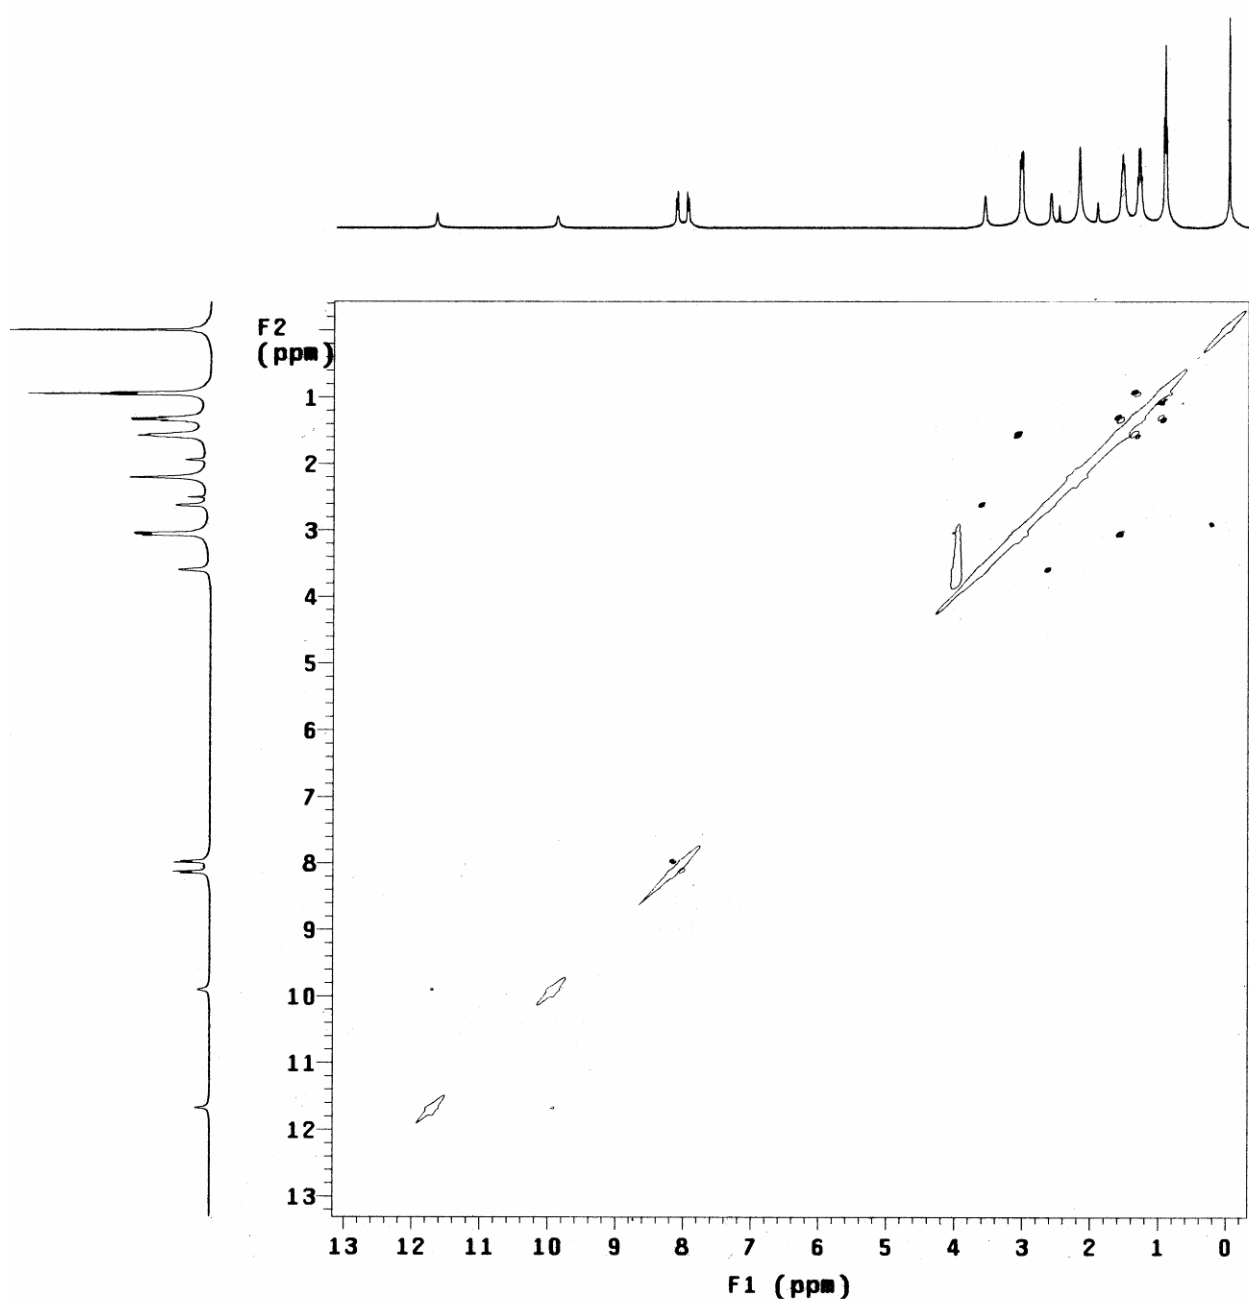

**Figure S25.** 2D-NOESY NMR spectrum of complex 4 in DMSO- $d_6$  at 298 K.

### Characterization of Cl<sup>-</sup>-complex, [(HL)<sup>+</sup>·Cl<sup>-</sup>]·DMF (5):

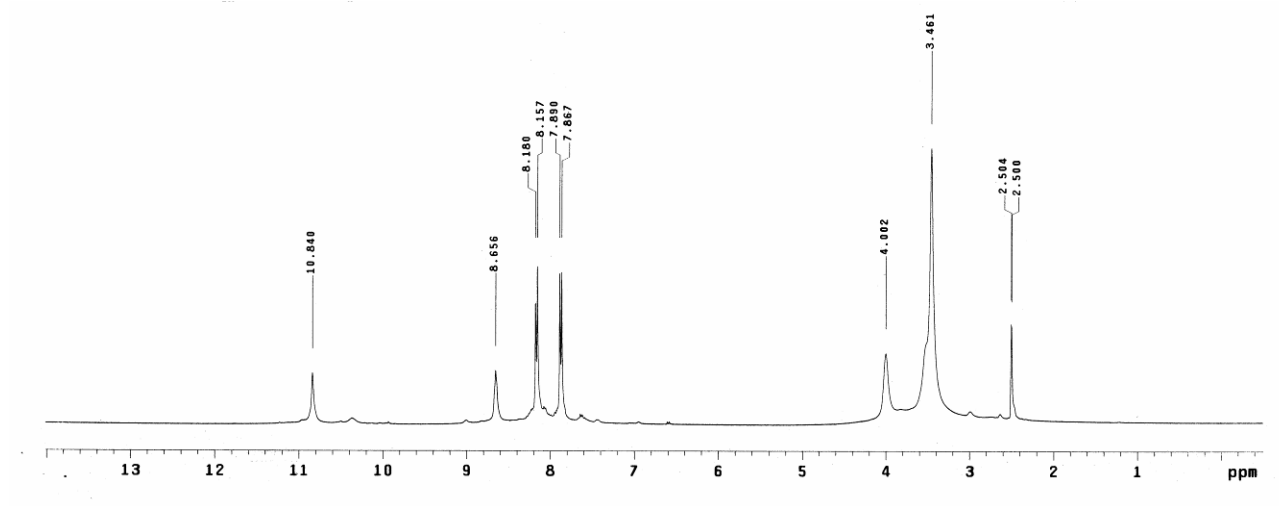

Figure S26. <sup>1</sup>H NMR spectrum of complex 5 in DMSO-*d*<sub>6</sub> at 298 K.

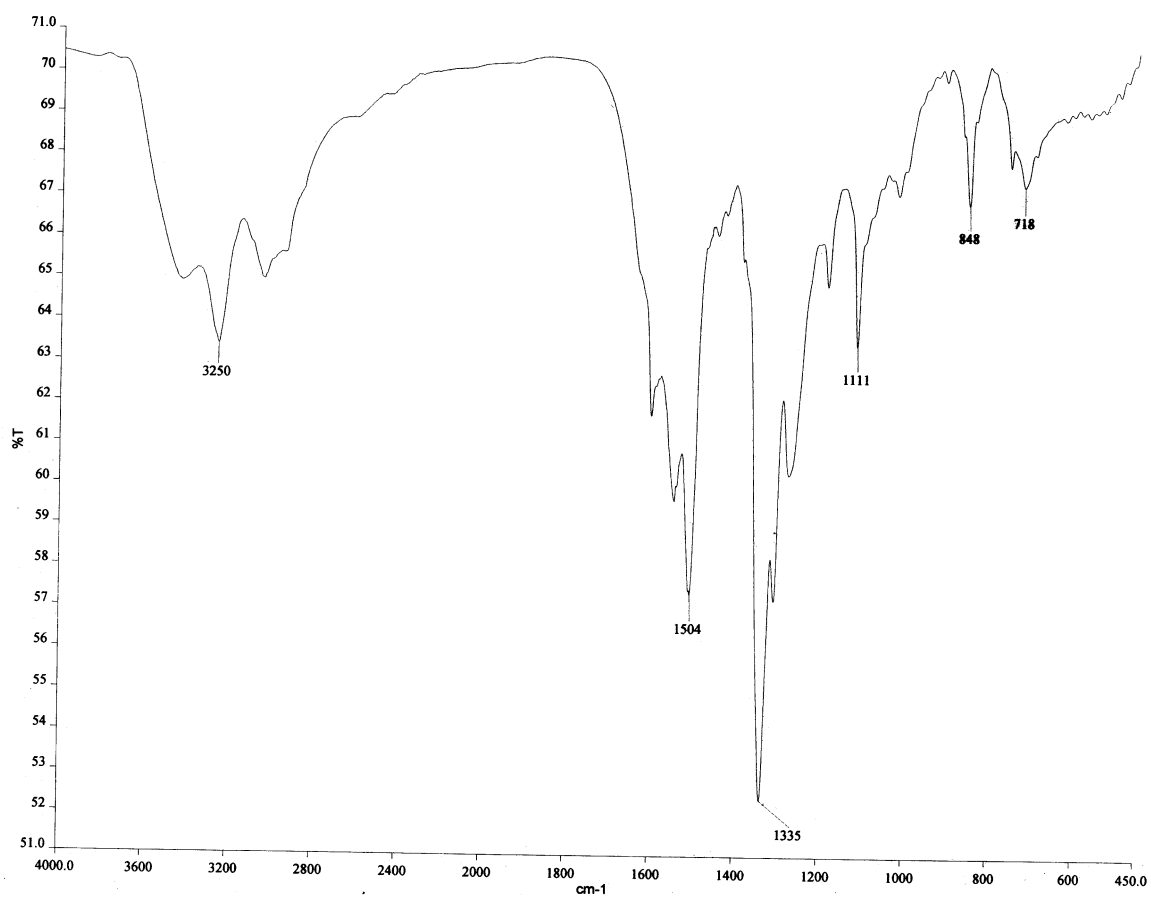

Figure S27. FT-IR spectrum of complex 5 recorded in KBr pellet.

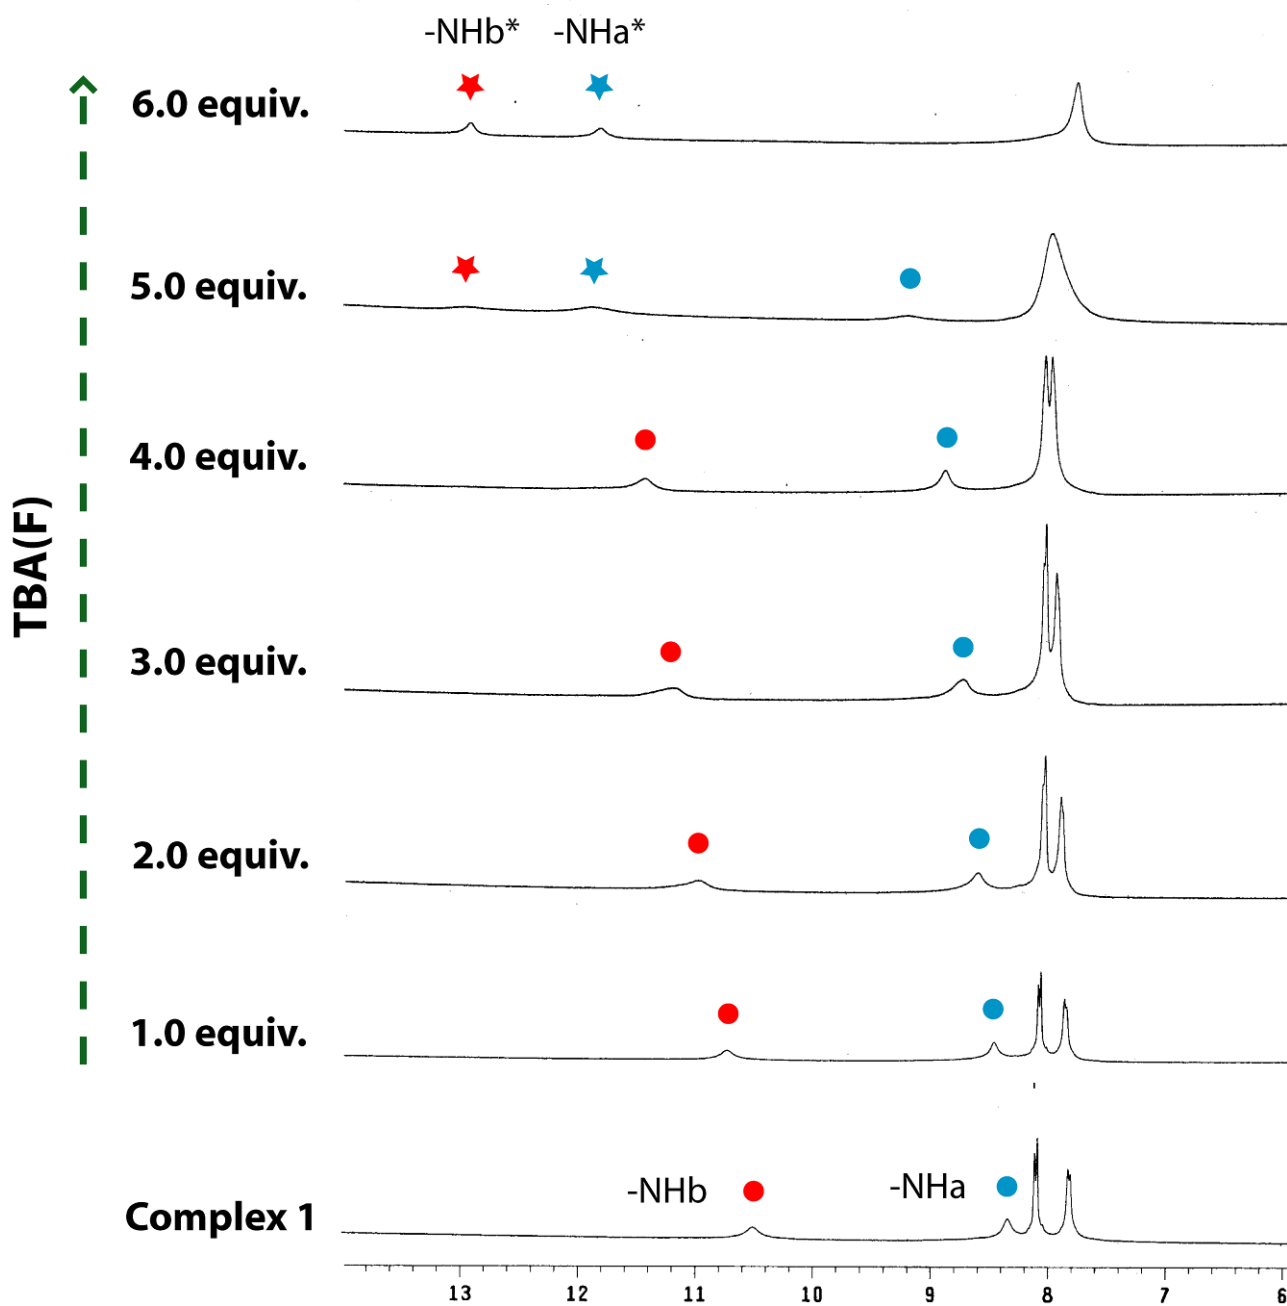

**Figure S28.** Expanded <sup>1</sup>H NMR spectra of **1a** obtained upon titration with increasing equivalents of TBAF in DMSO-*d*<sub>6</sub> showing the selective formation of phosphate capsule (**1**) in solution.



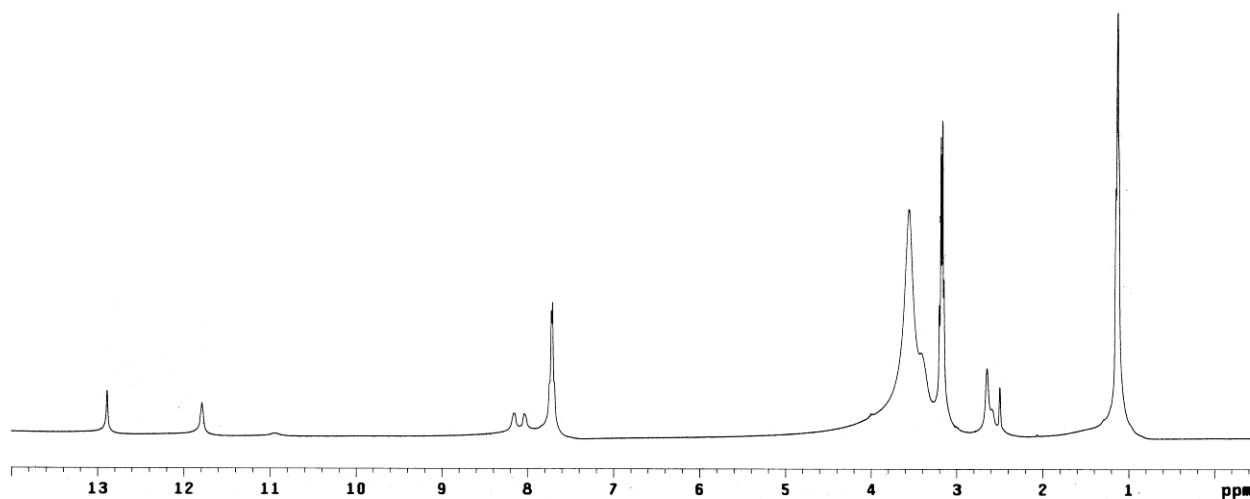

**Figure S29.** <sup>1</sup>H NMR spectrum of complex **1a** in presence of excess TEA(AcO) in DMSO-*d*<sub>6</sub> showing the selective formation of phosphate capsule (**1b**) in solution.

**Additional Crystallographic data:**

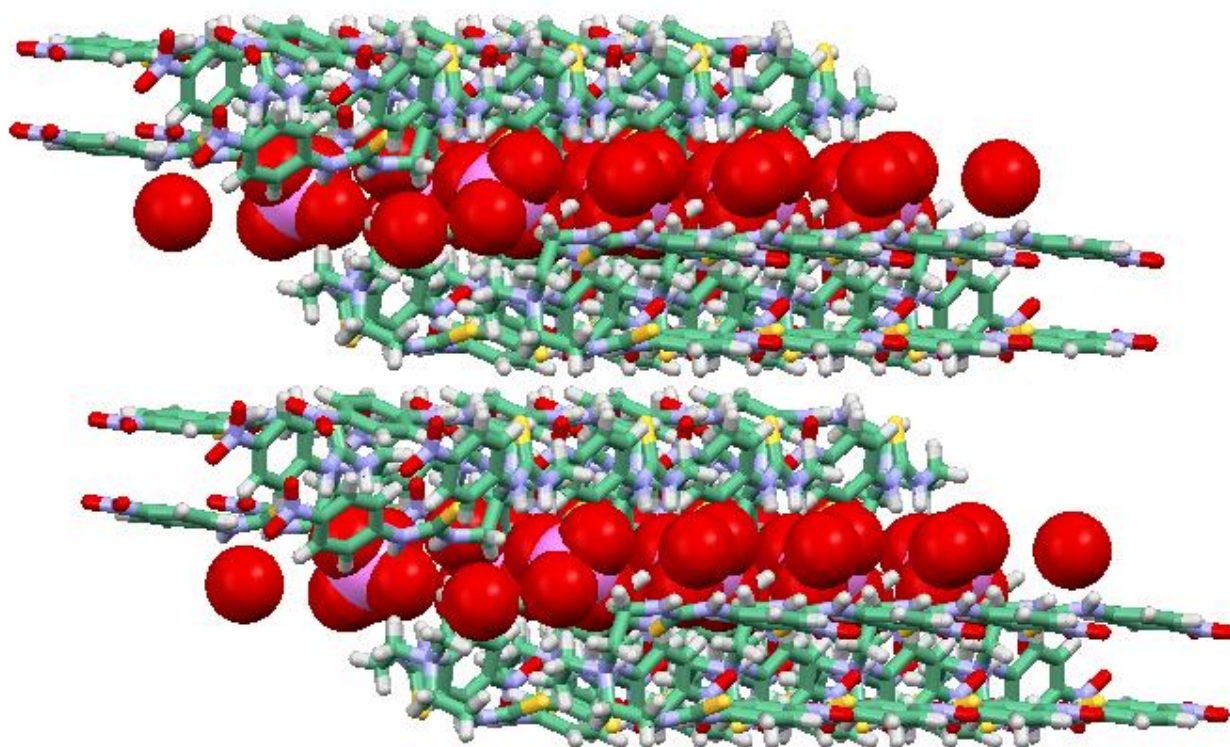

**Figure 30.** Crystal packing diagram of complex **1a** (view down the crystallographic *c*-axis).

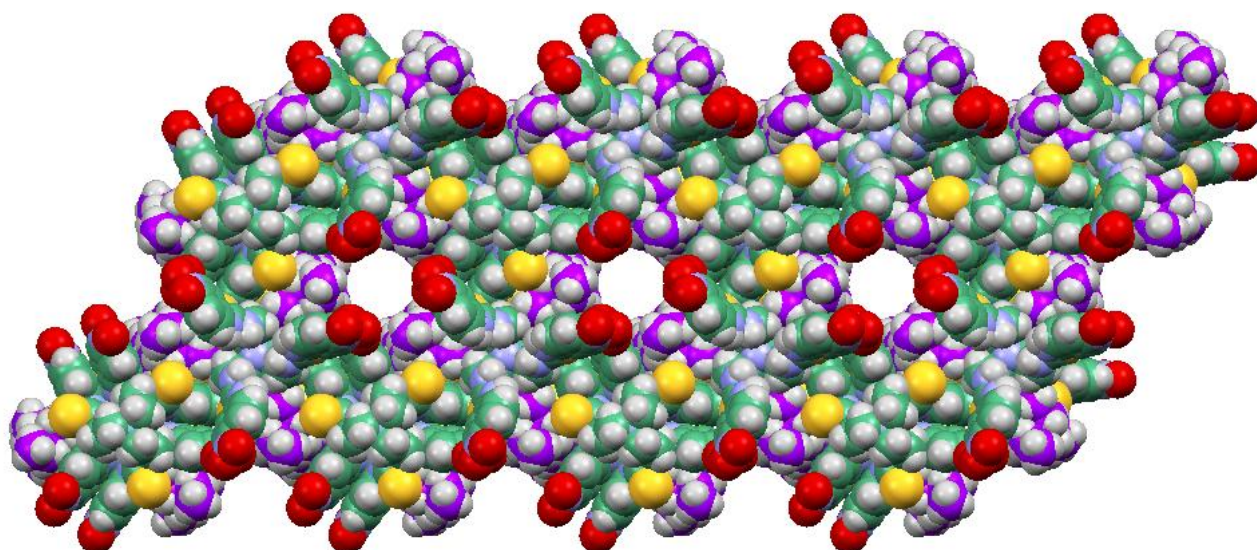

**Figure 31.** Crystal packing diagram of complex **1b**, showing the cylindrical voids of 568 Å<sup>3</sup> (view down the crystallographic c-axis).

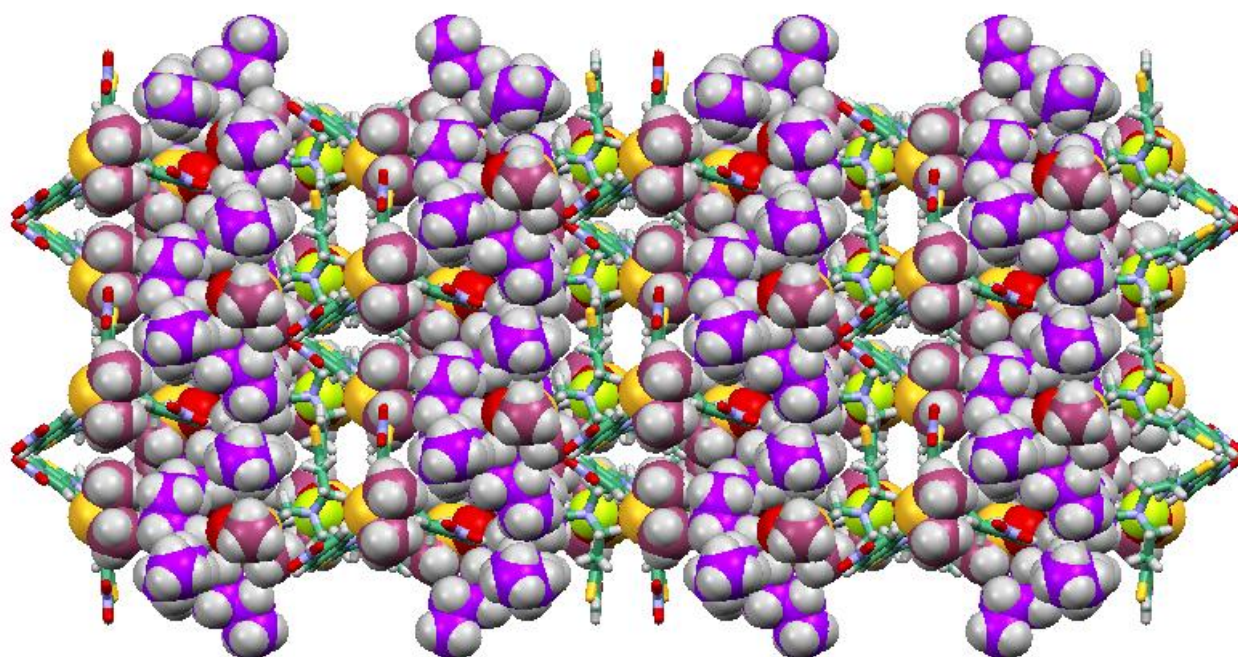

**Figure 32.** Crystal packing diagram of complex **2a** (view down the crystallographic c-axis).

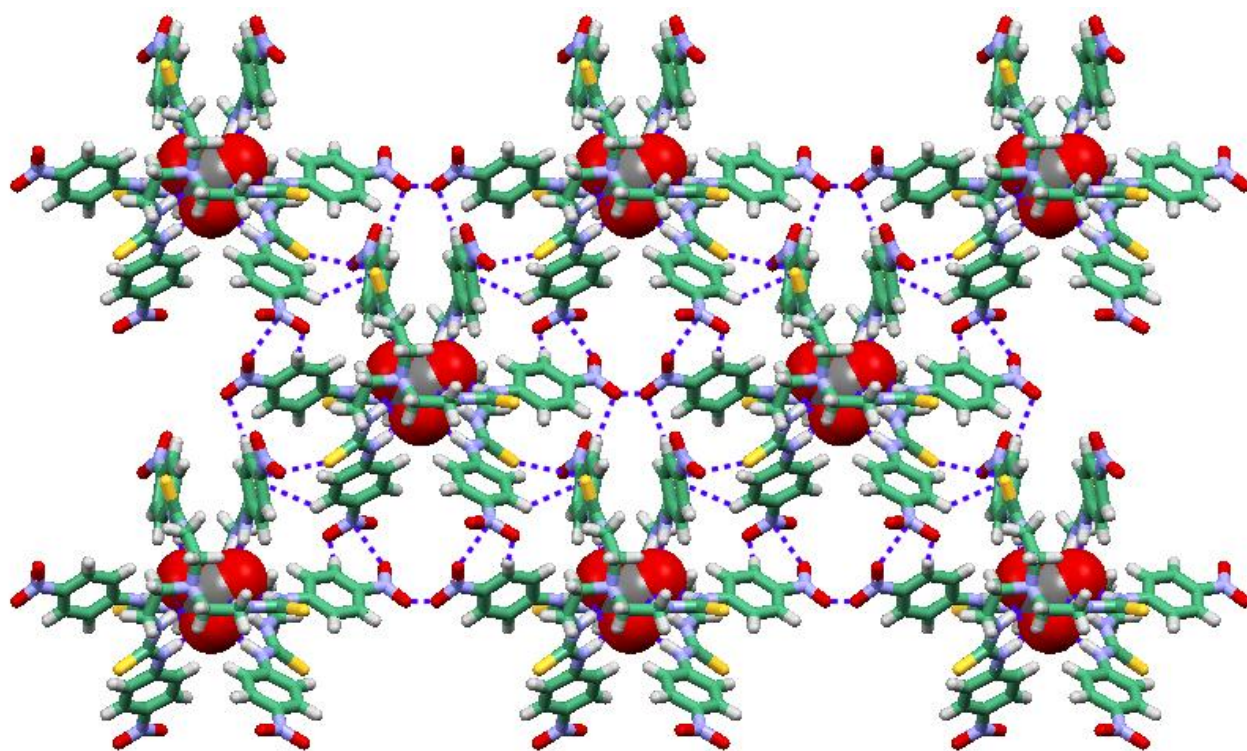

**Figure 33.** Crystal packing diagram of complex **3** (view down the crystallographic c-axis).

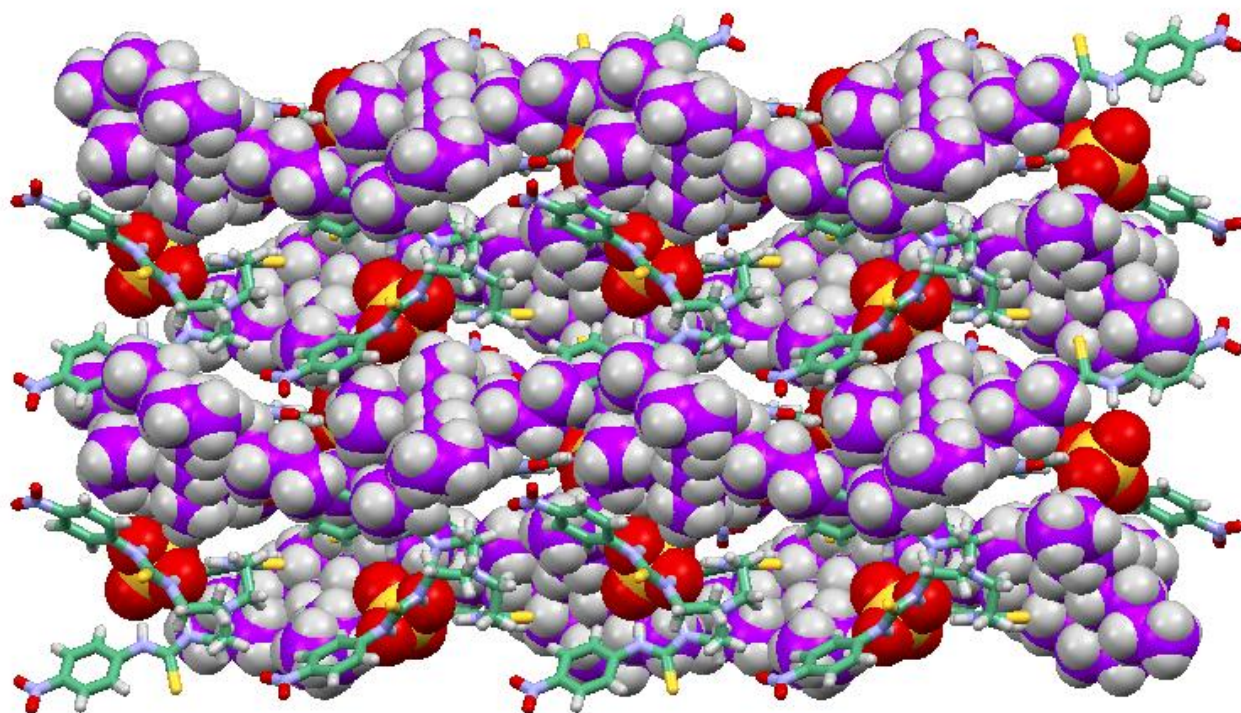

**Figure 34.** Crystal packing diagram of complex **4** (view down the crystallographic a-axis).

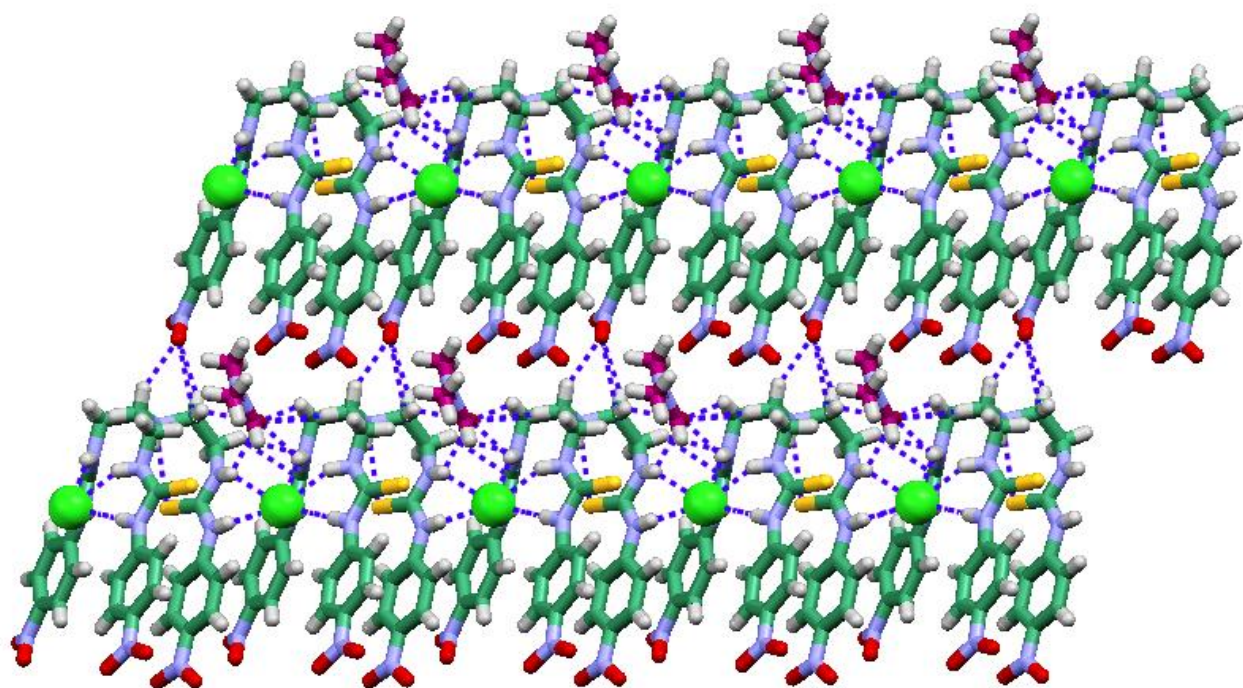

**Figure 35.** Crystal packing diagram of complex 5 (view down the crystallographic b-axis).
